# Supplementary material for: Development of semi-dwarf Echinacea purpurea by inducing silencing of the endogenous brassinosteroid- biosynthetic gene DWF4
Source: Research Square preprint supplement (doi:10.21203/rs.3.rs-6427165/v1), 2025-05-07
Supplement: Supplementary file 1 [file bf58424df7340bcfcc041df6.docx]

**Down-regulate of brassinosteroid-biosynthetic gene**

**EpDWF4 in *Echinacea purpurea* by RNA interference reveals DWARF phenotype**

Jin Zhao1, 2*, Jing Liu1, Yihan He1, Yuanyuan Fu2, 3*

1College of Agriculture, Guizhou University, Guiyang, 550025, China

2Department of Genetic Engineering and Graduate School of Biotechnology, Kyung Hee University, Yongin 17104, Korea

3 Basic Experimental Teaching Center of Life Sciences, Yangzhou University, Yangzhou 22509, China

*Corresponding author

Jin Zhao. E-mail: jzhao6@gzu.edu.cn. Tel: +86 18985183317. ORCID: 0009-0000-4632-4770

Yuanyuan Fu. E-mail: fyyyzu@yzu.edu.cn. Tel: +86 15952705610. ORCID: 0009-0006-4574-6684

**Supplementary information:**

**Table S1.**

**Table S1 Primers used for gene amplification and quantitative analysis.**

| Primer purpose | Name | Sequence (5’- 3’) |
| --- | --- | --- |
| Degenerate primers | *EpDWF4*-DF | GGAAAGAAAACTCACCTTTTTGTGCCC |
| *EpDWF4*-DR | TCAACCAATTCCCACTCGTATTTTAGGACC |
| 5’-RACE primers | *EpDWF4*-5’GSP | TCTTGGGCACAAAAAGGTGAGTTTTCTTTCC |
| 3’-RACE primers | *EpDWF4*-3’GSP | GGGTGGAAAGTGCTGCCAGTGATTGCAGCCGCGCATTTGG |
| Full-length *DWF4* cloning primers | *EpDWF4*-FF | ATCCCCTCACATACACTACAAGAATTTAAC |
| *EpDWF4*-FR | TATTAGAAAACAAGTATATTTGTGAGAGG |
| Universal primers for RACE | *AAP* | GGCCACGCGTGGACTAGTACGGGIIGGGIIGGGIIG |
| *AUAP* | GGCCACGCGTCGACTAGTAC |
| Flanking sequence analysis | LP primer | AAAAGTTGTGCTGGTACCGT |
| BP primer | CGGCGGTTCATCAACTTAGAG |
| RP primer | TGCCAAGGAAAATCAAACCCT |
| Sense and antisense primers for RNAi | *Sense*-F | GGCGCGCCTATAAAGGTTATGACATTCC |
| *Sense*-R | ATTTAAATAAATGGTGGATAAATATCGCC |
| *Antisense*-F | TCTAGAAAATGGTGGATAAATATCGCC |
| *Antisense*-R | CCCGGGTATAAAGGTTATGACATTCC |
| EpDWF4 ORF amplification primers | *DWF4 ORF*-F | AGATCTGCTATGGCTTCTGATCTTGAGTTCTTCCTCCATGATTCTTTC |
| *DWF4 ORF*-R | GTCGACACACATTTGTTTTCGGTGACAGAC |
| Genomic DNA PCR and RT PCR primers | *CHSA*-F | CCATTCCTTAACTAGTAAATAC |
| *CHSA*-R | TCTAGACTCACCTAGGATCC |
| *Ep18s rRNA*-F | GGATGGGTCGGCCGGTC |
| *Ep18s RNA*-R | CAGGCTGAGGTCTCGTTC |
| O/T *HPT*-F | ACACAGCCATCGGTCCAGAC |
| O/T *HPT*-R | ATCTTAGCCAGACGAGCGGG |
| *AtActin*-F | TCTCACACTGTGCCAATCTACG |
| *AtActin*-R | GAGATCCACATCTGCTGGAATGT |
| Southern blot analysis | *EpDWF4* probe-F | CGGCGGTTCATCAACTTAGAG |
| *EpDWF4* probe-R | CACATTTGTTTTCGGTGACAG |
| *HPT* probe-F | ACACAGCCATCGGTCCAGAC |
| *HPT* probe-R | ATCTTAGCCAGACGAGCGGG |
| qRT-PCR primers | *EpDWF4*-qRT-F | ATGTCTGATCTTGAGTTCTTCCTC |
| *EpDWF4*-qRT-R | ACACATTTGTTTTCGGTGAC |
| *Eptubulin*-F | CCGCTAACCTCACGTGGGTCCC |
| *Eptubulin*-R | GCCTTCCTCCTGAACATAGC |

**Table S2.**

Table S2 Morphometric analysis of wild-type and transgenic *Echinacea purpurea* suppressing *Ep*DWF4

|  | Wild-type (WT) | Transgenic (Tg) |
| --- | --- | --- |
| Plant height (cm) | 91 (±7.6) | 53.5 (± 3.8) |
| Internode size (cm) | 13.3 (± 2.7) | 7.7 (± 2.9) |
| Leaf size (cm) | 23.1 (± 2.01) | 15.33 (± 1.69) |
| Flower diameter (cm) | 9.43 (± 0.61) | 8.56 (± 1.07) |
| Petal number (per plant) | 17(± 3) | 15(± 2) |
| Capitulum diameter (cm) | 3.16 (± 0.53) | 2.46 (± 0.65) |

Table S3.

Table S3 Morphometric analysis of wild-type and homozygous transgenic *A. thaliana* overexpressing *Ep*DWF4

|  | Wild-type | Transgenic (Tg) |
| --- | --- | --- |
| Plant height (cm) | 35.0 (± 4.0) | 47.6 (±3.9 ) |
| Rosette length (cm) | 6.4 (±1.0) | 8.0 (± 0.7) |
| Rosette width (cm) | 2.1 (±0.5) | 2.2 (±0.5) |
| Rosette diameter at bolting (cm) | 14.9 (± 2.3) | 16.4 (± 1.6) |
| Silique petiole length (cm) | 0.8 (± 0.2) | 0.9 (± 0.1) |
| Silique length (cm) | 0.96 (± 0.2) | 1.31 (± 0.1) |

**Figure S1.**


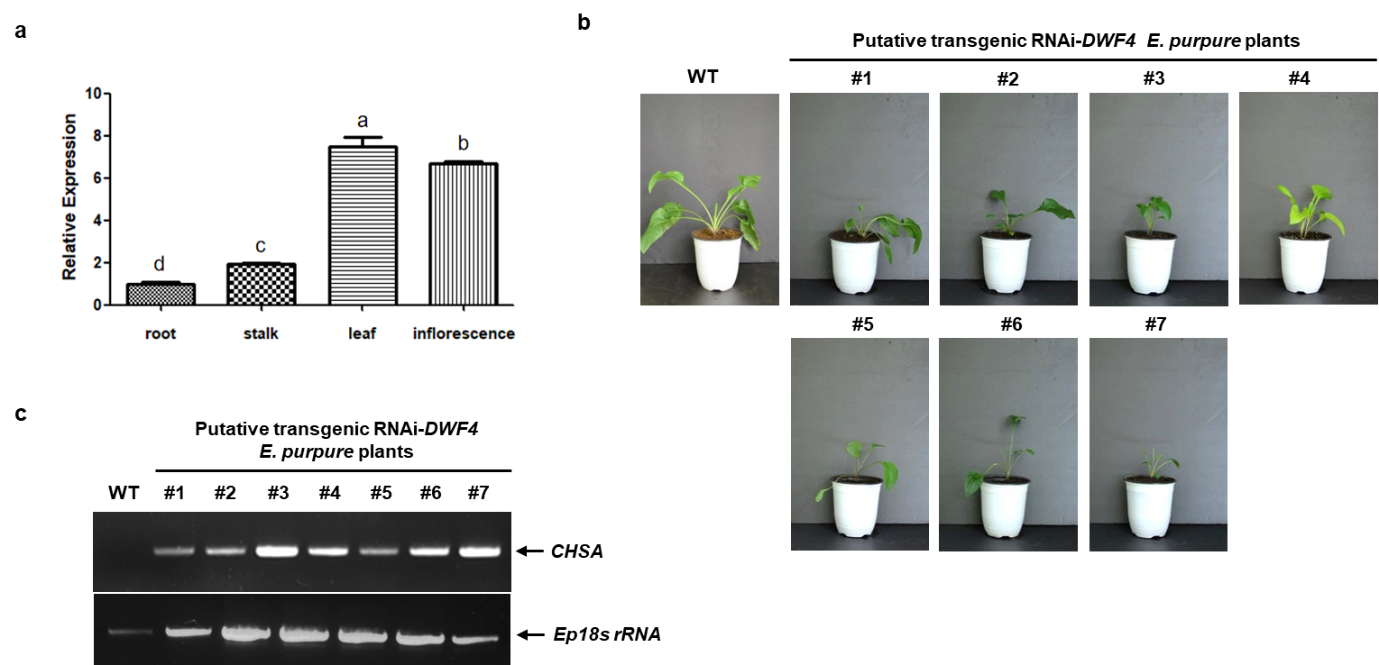


**Fig S1**. **a** Expression level of *EpDWF4* in root, stalk, leaf and inflorescence of *E. purpurea.* Means with different letters are significantly different at *P＜0.05*. **b** Wild - type and putative transgenic *E. purpurea* plants suppression EpDWF4. Scale bar = 10 cm. **c** Genomic DNA PCR for determining the presence of pFGC5941/shEpDWF4 construct in genomic DNA of putative transgenic *E. purpurea* plants suppression EpDWF4.

**Figure S2.**


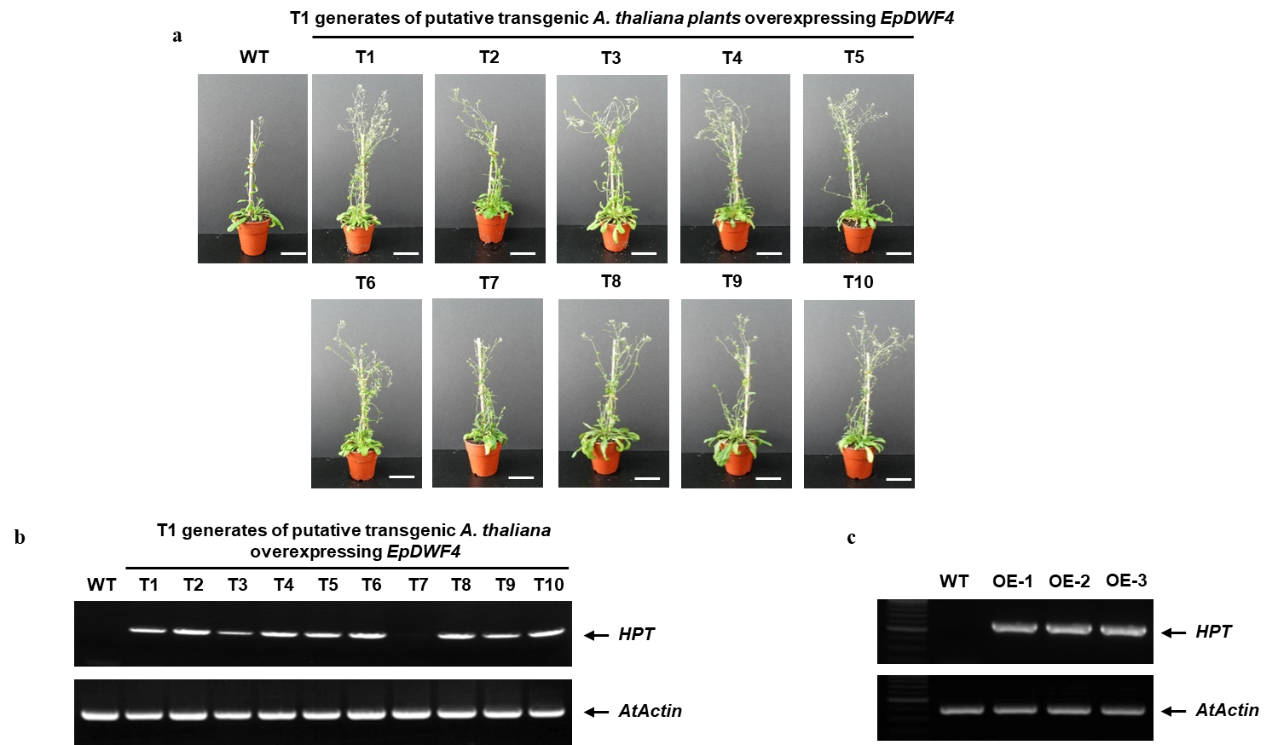


**Fig S2** Identification of EpDWF4 transgenic *A. thaliana* plants. **a** The phenotype of 10 T1 putative transgenic *A. thaliana* plants lines. **b** Genomic DNA PCR to determine *A. thaliana* plants which carrying *35S:EpDWF4*. **c** RT-PCR to determine the transcription of EpDWF4 in T3 generates of transgenic *A. thaliana*, scale bar = 7cm.

**Figure S3.**


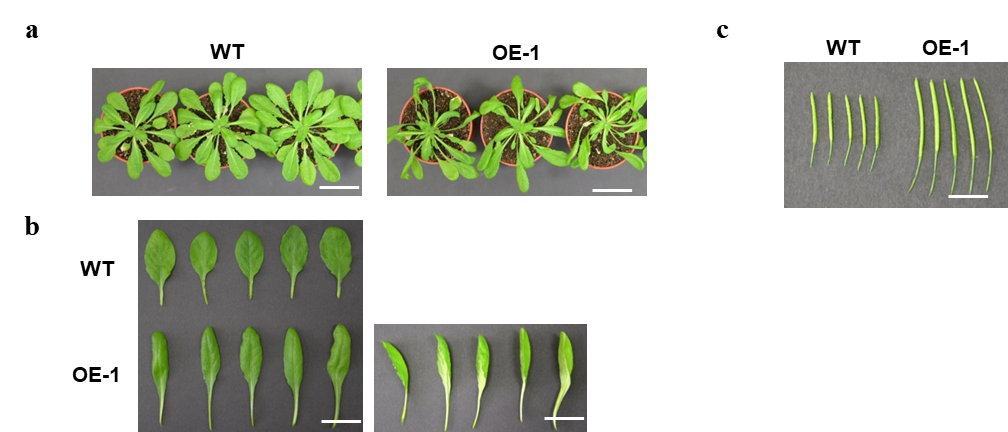


**Fig S3 a** The phenotype of WT and phenotypic consequence of OE-1 homozygous transgenic *A. thaliana* plant overexpressing EpDWF4, scale bar = 2 cm. **b** The rosette leaves of WT and OE-1. **c** The silique of WT and OE-1, scale bar = 0.5 cm.
